# Supplementary material for: Qualitative and Quantitative Detection of CRISPR-Associated Cas Gene in Gene-Edited Foods
Source: MDPI journal article supplement (doi:10.3390/foods12193681), 2023-10-07
Supplement: s1 [file s1]

Supplementary Table S1. The information of primers used in qualitative PCR.

| Primer   | Sequence(5'-3')       | Amplification length/bp |
|----------|-----------------------|-------------------------|
| Cas12-F1 | TACCAGCAGGGCGACATTC   | 263                     |
| Cas12-R1 | CAGAGCACTTTCCTGGCGATA |                         |
| Cas12-F2 | AGAACAACCACGGGCAAATC  |                         |
| Cas12-R2 | CCTTCCCATCCACGACCAC   | 354                     |
| Cas12-F3 | GCGACAATTCTCCGCTATG   |                         |
| Cas12-R3 | TGTGGCAGTCGTTGAGGTTA  | 271                     |

Supplementary Table S2. The information of primers and probes used in Qpcr.

| Primer        | Sequence(5'-3')                      | Amplification length/bp |
|---------------|--------------------------------------|-------------------------|
| Cas12-real-F1 | TTCGCGCCCTCCTCTGT                    | 95                      |
| Cas12-real-R1 | TGTGATGCTATTCCTCATTTGGA              |                         |
| Cas12-real-P1 | FAM-CGTTTTACTCCAGCTTCATGGCCCTCA-BHQ1 |                         |
| Cas12-real-F2 | ACCCAGAACGGGTTTATTTTCTACA            | 97                      |
| Cas12-real-R2 | AGGTATACTTTGTCTTCAGGAGGTTCA          |                         |
| Cas12-real-P2 | FAM-CTCACCTCCAAGATTGACCCGAGCAC-BHQ1  |                         |
| Cas12-real-F3 | CACAGAAGCCGTACTCCAAA                 | 96                      |
| Cas12-real-R3 | CGCGGTAGTCTGTCTCTTTATC               |                         |
| Cas12-real-P3 | FAM-AAGCTGTACTTCCAGAACCCGCAA-BHQ1    |                         |
